# Supplementary material for: Investigation of Strategies to Block Downstream Effectors of AT1R-Mediated Signalling to Prevent Aneurysm Formation in Marfan Syndrome
Source: MDPI journal article supplement (doi:10.3390/ijms25095025), 2024-05-04
Supplement: s1 [file s1]

# Investigation of strategies to block downstream effectors of AT1R mediated signalling to prevent aneurysm formation in Marfan Syndrome

Irene Valdivia Callejon<sup>1,\*</sup>, Lucia Buccioli<sup>1,\*</sup>, Jarl Bastianen<sup>1</sup>, Jolien Schippers<sup>1</sup>, Aline Verstraeten<sup>1</sup>, Ilse Luyckx<sup>1,3</sup>, Silke Peeters<sup>1</sup>, A.H. Jan Danser<sup>3</sup>, Roland Van Kimmenade<sup>4</sup>, Josephina Meester<sup>1</sup>, Bart Loeys<sup>1,3,\*\*</sup>

1. Centre of Medical Genetics, Antwerp University Hospital/University of Antwerp, Antwerp, Belgium;
2. Department of Human Genetics, Radboud University Medical Center, Nijmegen, The Netherlands;
3. Department of Internal Medicine, Erasmus Medical Center, Rotterdam, The Netherlands;
4. Department of Cardiology, Radboud University Medical Center, Nijmegen, The Netherlands;

\* These authors contributed equally

## Ascending aorta measurements

Ascending aortic dimensions were measured at 4, 8 and 12 weeks of age across all groups. While MFS mice exhibit a subtle increase in ascending aortic diameter compared to their WT counterparts at 8 and 12 weeks of age, this difference was not consistently significant. Thus, the ascending aorta does not serve as a suitable indicator for evaluating the treatments effects in *Fbn1*<sup>C1041G/+</sup> mice.

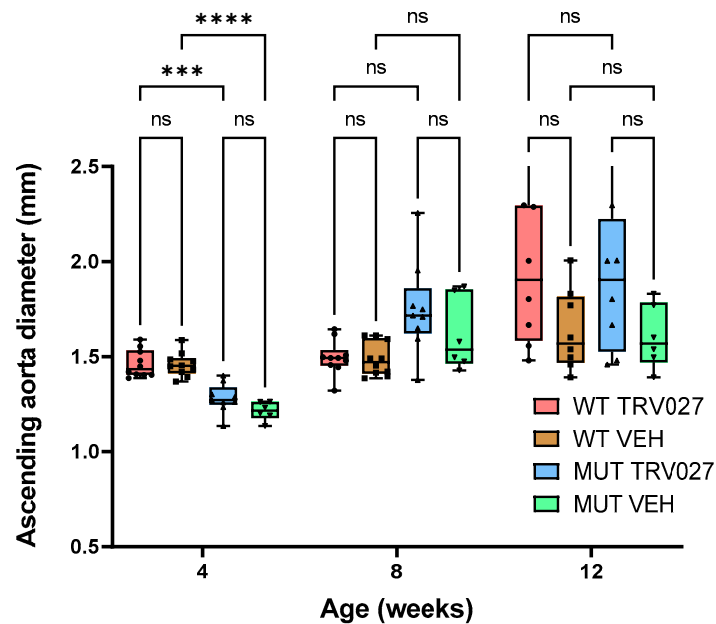

**Figure S1. Ascending aorta diameters of mice treated with TRV027 and saline solution.** MFS mice show a slight increase of the ascending aortic diameter at 8 and 12 weeks of age, although this increase is not always statistically significant. No differences between MFS mice treated with TRV027 and those given saline solution are observed. Statistical test analysis: one-way ANOVA and Tukey post-test per timepoint. \*\*\*  $p \leq 0.001$ , \*\*  $p \leq 0.01$  and \*  $p \leq 0.05$ . VEH: vehicle, WT: Wild-type, MUT: mutant.

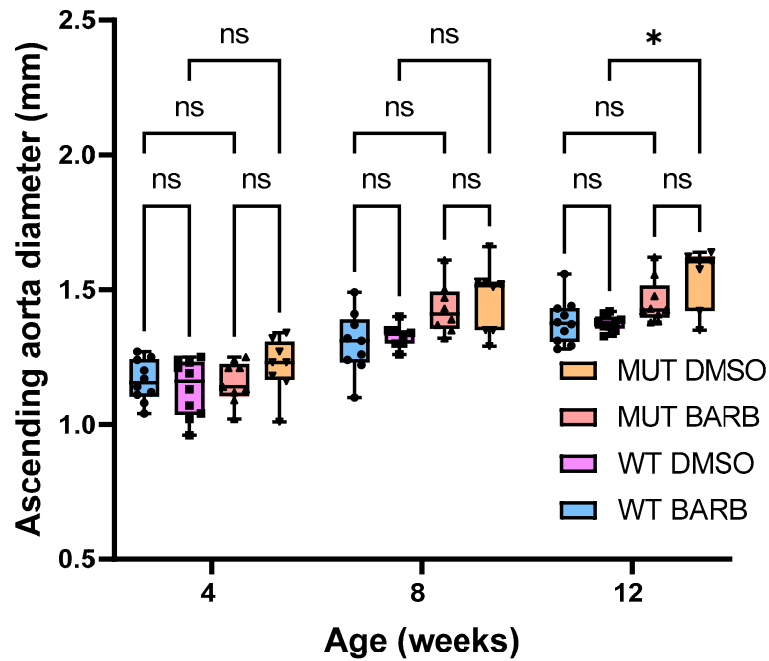

**Figure S2. Ascending aorta diameters of mice treated with barbadin + losartan (25 mg/kg/day) and mice treated with losartan (25 mg/kg/day) alone.** A slight increase in ascending aortic diameter is observed in MFS mice at 8 and 12 weeks of age, although this increase is not always statistically significant. No significant differences between MFS mice treated with barbadin + losartan (25 mg/kg/day) and mice treated with losartan (25 mg/kg/day) alone are observed. Statistical test analysis: one-way ANOVA and Tukey post-test per timepoint. \*\*\*  $p \leq 0.001$ , \*\*  $p \leq 0.01$  and \*  $p \leq 0.05$ . VEH: vehicle, LOS: Losartan, BARB: Barbadin, WT: Wild-type, MUT: mutant.

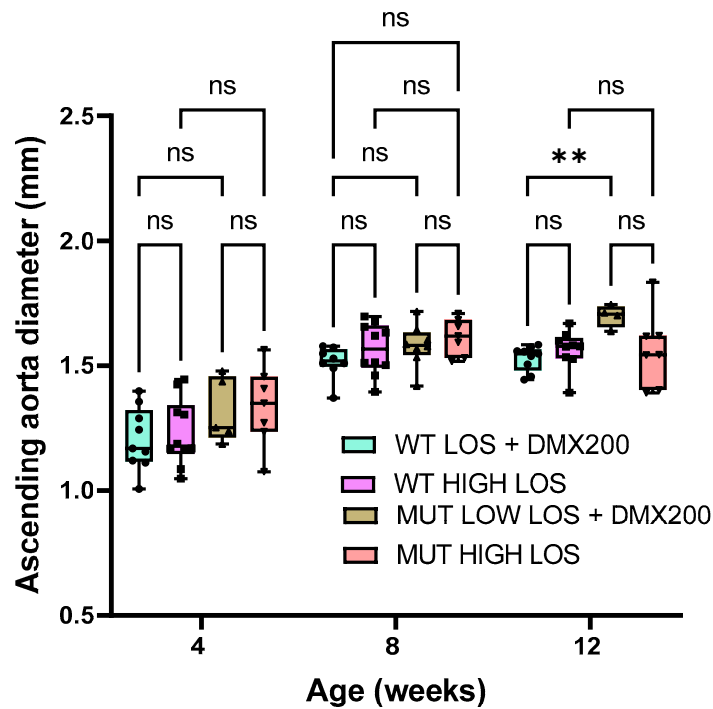

**Figure S3. Ascending aorta diameters of mice treated with a high dose of losartan (50 mg/kg/day) and mice treated with DMX200 + losartan (5 mg/kg/day).** MFS mice display a subtle increase in ascending aortic diameters at 8 and 12 weeks of age, although this increase is not always significant. MFS mice that were treated with high dose of losartan (50 mg/kg/day) do not exhibit a visually discernible or statistically significant increase compared to their WT counterparts. Statistical test analysis: one-way ANOVA and Tukey post-test per timepoint. \*\*\*  $p \leq 0.001$ , \*\* $p \leq 0.01$  and \* $p \leq 0.05$ . VEH: vehicle, LOS: Losartan, WT: Wild-type, MUT: mutant.

## Weights measurements

Mice weights were recorded prior to performing echocardiography at 4, 8 and 12 weeks of age.

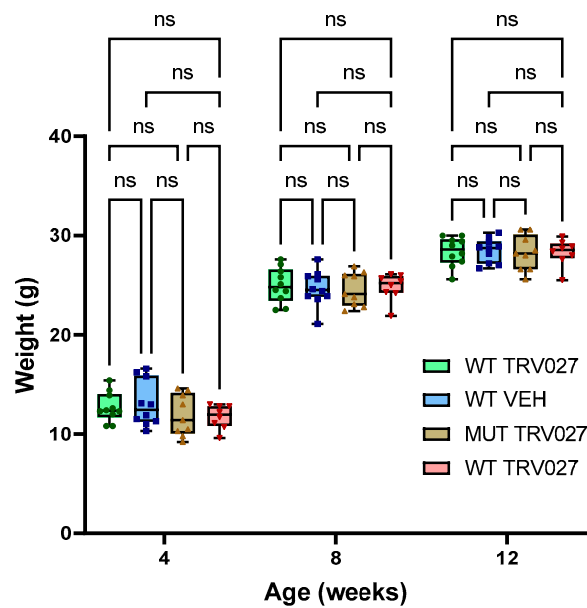

**Figure S4. Comparison of the weights from mice treated with TRV027 and saline solution.** No significant differences are observed in weight between MFS and WT mice, or between mice treated with TRV027 and saline solution. Statistical test analysis: one-way ANOVA and Tukey post-test per timepoint. \*\*\*  $p \leq 0.001$ , \*\* $p \leq 0.01$  and \* $p \leq 0.05$ . VEH: vehicle, WT: Wild-type, MUT: mutant.

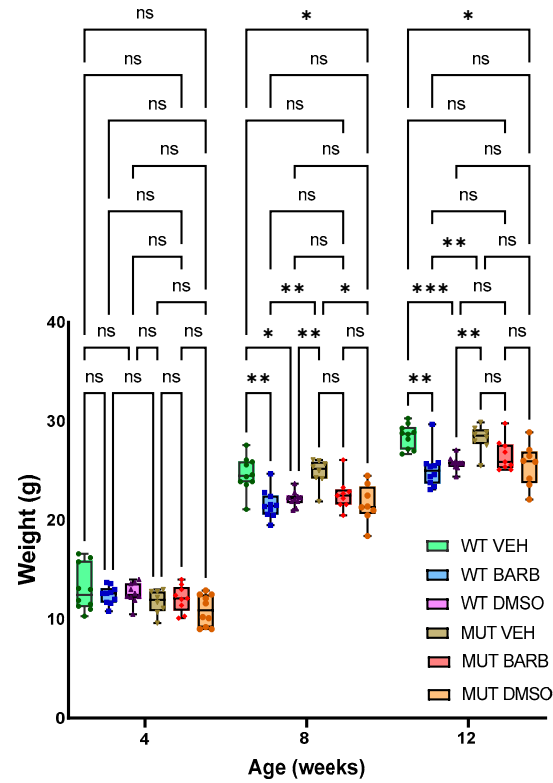

**Figure S5. Comparison of the weights between mice treated with barbadin + losartan (25 mg/kg/day), losartan alone (25 mg/kg/day), and with saline solution.** Mice that received peritoneal injections of either barbadin or DMSO tend to show lower weights compared to the vehicle group (saline solution). This difference, however, is not consistently significant. Statistical test analysis: one-way ANOVA and Tukey post-test per timepoint. \*\*\*  $p \leq 0.001$ , \*\*  $p \leq 0.01$  and \*  $p \leq 0.05$ . EH: vehicle, LOS: Losartan, BARB: Barbadin, WT: Wild-type, MUT: mutant.

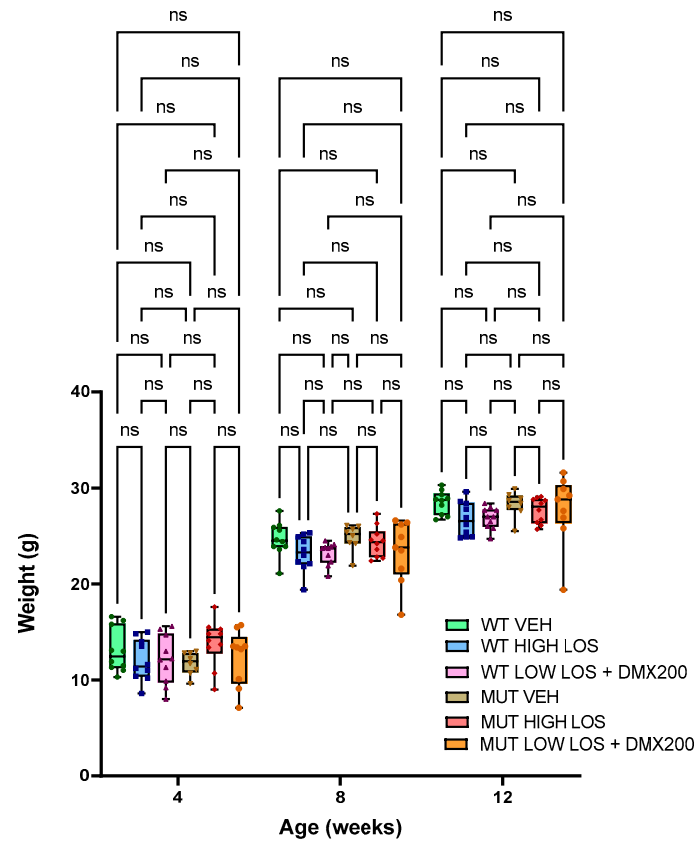

**Figure S6. Comparison of the weights between mice treated with DMX200 + losartan (5 mg/kg/day), losartan alone (50 mg/kg/day), and saline solution.** No significant differences in weight are observed among mice in these groups. Statistical test analysis: one-way ANOVA and Tukey post-test per timepoint. \*\*\*  $p \leq 0.001$ , \*\* $p \leq 0.01$  and \* $p \leq 0.05$ . VEH: vehicle, LOS: Losartan, WT: Wild-type, MUT: mutant.

### **Comparison of weight-normalised aortic root diameters between barbadin, barbadin + losartan and vehicle groups.**

Since some differences in weight were observed among mice receiving peritoneal injections of either barbadin or DMSO in comparison to those treated with saline solution (FigS5), we also performed a comparison where diameters were adjusted by weight. This normalization process involves multiplying the average value of each individual mouse by its weight and dividing it by the average weight across all animals. This weight-normalised comparison also showed that the addition of barbadin to losartan treatment does not provide any benefits regarding the aortic root dilatation of MFS mice (Fig.S7).

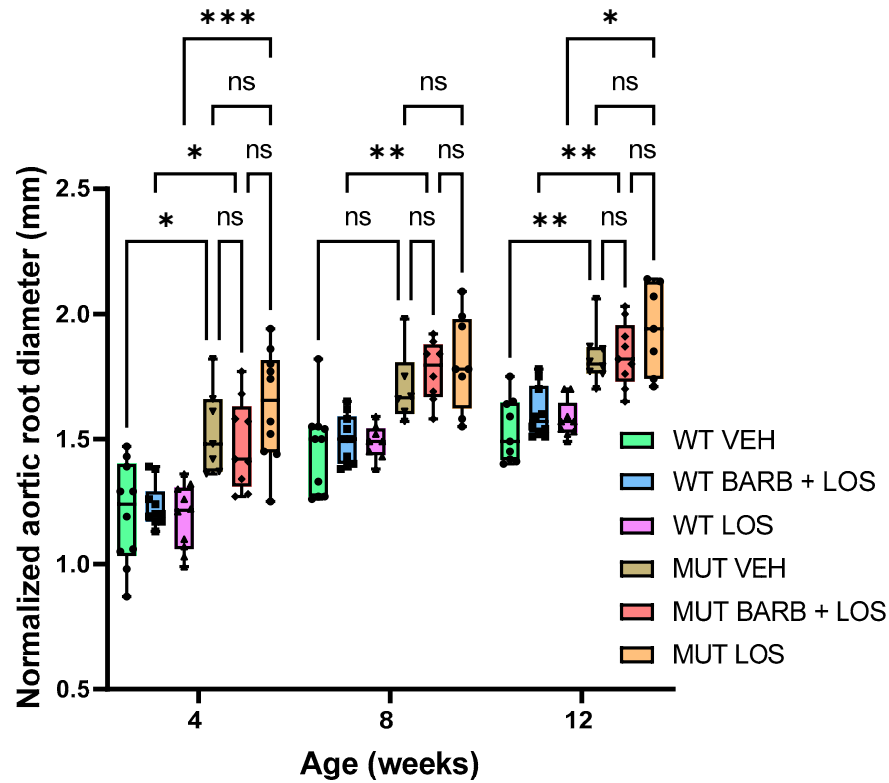

Figure S7. Weight-normalised aortic root diameters of mice treated with barbadin + losartan (25 mg/kg/day) and mice treated with losartan (25 mg/kg/day) alone. Barbadin + losartan treatment does not have any significantly benefit over those treated with losartan alone. Data represented as boxplots. Statistical test analysis: one-way ANOVA and Tukey post-test per timepoint. \*\*\*  $p \leq 0.001$ , \*\* $p \leq 0.01$  and \* $p \leq 0.05$ . VEH: vehicle, LOS: Losartan, BARB: Barbadin, WT: Wild-type, MUT: mutant.

## Statistical parameters

Table S1. Effects sizes, confidence interval and adjusted p-value for the different comparisons of the aortic root diameters between vehicle groups (WT VEH, MUT VEH) and TRV027 groups (WT TRV027, MUT TRV027). Test: one-way ANOVA and Tukey post-test per timepoint.

| Tukey's multiple comparisons test | Mean Diff. | 95.00% CI of diff.  | Adjusted P Value |
|-----------------------------------|------------|---------------------|------------------|
| <b>4 weeks</b>                    |            |                     |                  |
| WT TRV027 vs. WT VEH              | 0.003933   | -0.08173 to 0.08959 | 0.9992           |
| WT TRV027 vs. MUT TRV027          | 0.1813     | 0.08303 to 0.2796   | 0.0004           |
| WT TRV027 vs. MUT VEH             | 0.2479     | 0.1596 to 0.3362    | <0.0001          |
| WT VEH vs. MUT TRV027             | 0.1774     | 0.08377 to 0.2710   | 0.0003           |
| WT VEH vs. MUT VEH                | 0.244      | 0.1612 to 0.3267    | <0.0001          |
| MUT TRV027 vs. MUT VEH            | 0.06659    | -0.02912 to 0.1623  | 0.2228           |
| <b>8 weeks</b>                    |            |                     |                  |

|                          |          |                      |        |
|--------------------------|----------|----------------------|--------|
| WT TRV027 vs. WT VEH     | 0.008633 | -0.1042 to 0.1215    | 0.9963 |
| WT TRV027 vs. MUT TRV027 | -0.257   | -0.5200 to 0.005986  | 0.0558 |
| WT TRV027 vs. MUT VEH    | -0.1206  | -0.4087 to 0.1675    | 0.526  |
| WT VEH vs. MUT TRV027    | -0.2657  | -0.5286 to -0.002717 | 0.0476 |
| WT VEH vs. MUT VEH       | -0.1293  | -0.4174 to 0.1589    | 0.4742 |
| MUT TRV027 vs. MUT VEH   | 0.1364   | -0.1992 to 0.4719    | 0.6375 |
| <b>12 weeks</b>          |          |                      |        |
| WT TRV027 vs. WT VEH     | 0.3633   | -0.2064 to 0.9330    | 0.2654 |
| WT TRV027 vs. MUT TRV027 | 0.0475   | -0.6472 to 0.7422    | 0.9971 |
| WT TRV027 vs. MUT VEH    | 0.3953   | -0.1725 to 0.9631    | 0.2032 |
| WT VEH vs. MUT TRV027    | -0.3158  | -0.8848 to 0.2532    | 0.37   |
| WT VEH vs. MUT VEH       | 0.03199  | -0.2693 to 0.3332    | 0.9886 |
| MUT TRV027 vs. MUT VEH   | 0.3478   | -0.2193 to 0.9148    | 0.2888 |

Table S2. Effects sizes, confidence interval and adjusted p-value for the different comparisons of the aortic root diameters between vehicle groups (WT VEH, MUT VEH), barbadin + medium dose losartan (WT BARB + LOS, MUT BARB+ LOS) and medium dose losartan (WT LOS, MUT LOS). Test: one-way ANOVA and Tukey post-test per timepoint.

| <b>Tukey's multiple comparisons test</b> | <b>Mean Diff.</b> | <b>95.00% CI of diff.</b> | <b>Adjusted P Value</b> |
|------------------------------------------|-------------------|---------------------------|-------------------------|
| <b>4 weeks</b>                           |                   |                           |                         |
| WT VEH vs. WT LOS                        | 0.061             | -0.08458 to 0.2066        | 0.7438                  |
| WT VEH vs. WT BARB + LOS                 | 0.0287            | -0.1166 to 0.1740         | 0.9852                  |
| WT VEH vs. MUT VEH                       | -0.1705           | -0.3101 to -0.03085       | 0.0147                  |
| WT VEH vs. MUT LOS                       | -0.1653           | -0.3654 to 0.03482        | 0.1355                  |
| WT VEH vs. MUT BARB + LOS                | -0.1692           | -0.3123 to -0.02620       | 0.0171                  |
| WT LOS vs. WT BARB + LOS                 | -0.0323           | -0.1318 to 0.06716        | 0.9009                  |
| WT LOS vs. MUT VEH                       | -0.2315           | -0.3180 to -0.1450        | <0.0001                 |
| WT LOS vs. MUT LOS                       | -0.2263           | -0.4086 to -0.04399       | 0.0141                  |
| WT LOS vs. MUT BARB + LOS                | -0.2302           | -0.3250 to -0.1355        | <0.0001                 |
| WT BARB + LOS vs. MUT VEH                | -0.1992           | -0.2848 to -0.1135        | <0.0001                 |
| WT BARB + LOS vs. MUT LOS                | -0.194            | -0.3761 to -0.01184       | 0.0355                  |
| WT BARB + LOS vs. MUT BARB + LOS         | -0.1979           | -0.2920 to -0.1039        | <0.0001                 |
| MUT VEH vs. MUT LOS                      | 0.005196          | -0.1749 to 0.1853         | >0.9999                 |
| MUT VEH vs. MUT BARB + LOS               | 0.001238          | -0.07828 to 0.08076       | >0.9999                 |
| MUT LOS vs. MUT BARB + LOS               | -0.003958         | -0.1851 to 0.1772         | >0.9999                 |
| <b>8 weeks</b>                           |                   |                           |                         |
| WT VEH vs. WT LOS                        | 0.1261            | -0.03069 to 0.2829        | 0.1406                  |
| WT VEH vs. WT BARB + LOS                 | 0.1509            | -0.01325 to 0.3151        | 0.08                    |
| WT VEH vs. MUT VEH                       | -0.2745           | -0.4462 to -0.1028        | 0.0014                  |
| WT VEH vs. MUT LOS                       | -0.1404           | -0.3664 to 0.08565        | 0.3737                  |
| WT VEH vs. MUT BARB + LOS                | -0.1764           | -0.3423 to -0.01047       | 0.0344                  |
| WT LOS vs. WT BARB + LOS                 | 0.02482           | -0.06608 to 0.1157        | 0.9391                  |
| WT LOS vs. MUT VEH                       | -0.4006           | -0.5189 to -0.2822        | <0.0001                 |

|                                  |         |                     |         |
|----------------------------------|---------|---------------------|---------|
| WT LOS vs. MUT LOS               | -0.2665 | -0.4693 to -0.06370 | 0.0118  |
| WT LOS vs. MUT BARB + LOS        | -0.3025 | -0.4006 to -0.2044  | <0.0001 |
| WT BARB + LOS vs. MUT VEH        | -0.4254 | -0.5523 to -0.2986  | <0.0001 |
| WT BARB + LOS vs. MUT LOS        | -0.2913 | -0.4965 to -0.08613 | 0.0058  |
| WT BARB + LOS vs. MUT BARB + LOS | -0.3273 | -0.4412 to -0.2134  | <0.0001 |
| MUT VEH vs. MUT LOS              | 0.1341  | -0.07540 to 0.3436  | 0.3103  |
| MUT VEH vs. MUT BARB + LOS       | 0.0981  | -0.03194 to 0.2281  | 0.1843  |
| MUT LOS vs. MUT BARB + LOS       | -0.036  | -0.2422 to 0.1702   | 0.988   |
| <b>12 weeks</b>                  |         |                     |         |
| WT VEH vs. WT LOS                | 0.1102  | -0.05105 to 0.2715  | 0.2701  |
| WT VEH vs. WT BARB + LOS         | 0.1249  | -0.05144 to 0.3012  | 0.2565  |
| WT VEH vs. MUT VEH               | -0.3027 | -0.4678 to -0.1376  | 0.0004  |
| WT VEH vs. MUT LOS               | -0.2145 | -0.4620 to 0.03292  | 0.1034  |
| WT VEH vs. MUT BARB + LOS        | -0.192  | -0.3518 to -0.03224 | 0.016   |
| WT LOS vs. WT BARB + LOS         | 0.01467 | -0.1207 to 0.1500   | 0.9991  |
| WT LOS vs. MUT VEH               | -0.413  | -0.5282 to -0.2978  | <0.0001 |
| WT LOS vs. MUT LOS               | -0.3248 | -0.5596 to -0.08994 | 0.0087  |
| WT LOS vs. MUT BARB + LOS        | -0.3022 | -0.4048 to -0.1996  | <0.0001 |
| WT BARB + LOS vs. MUT VEH        | -0.4276 | -0.5686 to -0.2867  | <0.0001 |
| WT BARB + LOS vs. MUT LOS        | -0.3394 | -0.5788 to -0.1001  | 0.0058  |
| WT BARB + LOS vs. MUT BARB + LOS | -0.3169 | -0.4499 to -0.1838  | <0.0001 |
| MUT VEH vs. MUT LOS              | 0.0882  | -0.1475 to 0.3239   | 0.7513  |
| MUT VEH vs. MUT BARB + LOS       | 0.1107  | -0.001363 to 0.2228 | 0.0537  |
| MUT LOS vs. MUT BARB + LOS       | 0.02254 | -0.2121 to 0.2572   | 0.9989  |

Table S3. Effects sizes, confidence interval and adjusted p-value for the different comparisons of the aortic root diameters between vehicle groups (WT VEH, MUT VEH), DMX200 + low dose losartan (WT low LOS + DMX200, VEH low LOS + DMX200) and high dose of losartan (WT high LOS, MUT high LOS). Test: one-way ANOVA and Tukey post-test per timepoint.

| <b>Tukey's multiple comparisons test</b> | <b>Mean Diff.</b> | <b>95.00% CI of diff.</b> | <b>Adjusted P Value</b> |
|------------------------------------------|-------------------|---------------------------|-------------------------|
| <b>4 weeks</b>                           |                   |                           |                         |
| WT VEH vs. WT high LOS                   | -0.0208           | -0.1764 to 0.1348         | 0.9978                  |
| WT VEH vs. WT low LOS + DMX200           | -0.002511         | -0.1627 to 0.1577         | >0.9999                 |
| WT VEH vs. MUT VEH                       | -0.177            | -0.3435 to -0.01055       | 0.0338                  |
| WT VEH vs. MUT high LOS                  | -0.1691           | -0.3486 to 0.01042        | 0.0716                  |
| WT VEH vs. MUT low LOS + DMX200          | -0.2577           | -0.4964 to -0.01897       | 0.0323                  |
| WT high LOS vs. WT low LOS + DMX200      | 0.01829           | -0.1187 to 0.1553         | 0.9978                  |
| WT high LOS vs. MUT VEH                  | -0.1562           | -0.3018 to -0.01060       | 0.0322                  |
| WT high LOS vs. MUT high LOS             | -0.1483           | -0.3098 to 0.01322        | 0.0818                  |
| WT high LOS vs. MUT low LOS + DMX200     | -0.2369           | -0.4684 to -0.005401      | 0.0444                  |
| WT low LOS + DMX200 vs. MUT VEH          | -0.1745           | -0.3253 to -0.02369       | 0.0193                  |
| WT low LOS + DMX200 vs. MUT high LOS     | -0.1666           | -0.3324 to -0.0007647     | 0.0486                  |



|                                              |          |                      |         |
|----------------------------------------------|----------|----------------------|---------|
| WT low LOS + DMX200 vs. MUT low LOS + DMX200 | -0.2552  | -0.4882 to -0.02218  | 0.0306  |
| MUT VEH vs. MUT high LOS                     | 0.007925 | -0.1638 to 0.1796    | >0.9999 |
| MUT VEH vs. MUT low LOS + DMX200             | -0.08066 | -0.3161 to 0.1547    | 0.8298  |
| MUT high LOS vs. MUT low LOS + DMX200        | -0.08859 | -0.3296 to 0.1524    | 0.808   |
| <b>8 weeks</b>                               |          |                      |         |
| WT VEH vs. WT high LOS                       | 0.0982   | -0.06969 to 0.2661   | 0.4327  |
| WT VEH vs. WT low LOS + DMX200               | 0.06262  | -0.1154 to 0.2407    | 0.8606  |
| WT VEH vs. MUT VEH                           | -0.2029  | -0.3671 to -0.03871  | 0.013   |
| WT VEH vs. MUT high LOS                      | -0.03493 | -0.2540 to 0.1842    | 0.9949  |
| WT VEH vs. MUT low LOS + DMX200              | -0.2729  | -0.5217 to -0.02413  | 0.0295  |
| WT high LOS vs. WT low LOS + DMX200          | -0.03558 | -0.1688 to 0.09763   | 0.9497  |
| WT high LOS vs. MUT VEH                      | -0.3011  | -0.4065 to -0.1957   | <0.0001 |
| WT high LOS vs. MUT high LOS                 | -0.1331  | -0.3266 to 0.06033   | 0.2591  |
| WT high LOS vs. MUT low LOS + DMX200         | -0.3711  | -0.6084 to -0.1339   | 0.0049  |
| WT low LOS + DMX200 vs. MUT VEH              | -0.2655  | -0.3931 to -0.1379   | 0.0001  |
| WT low LOS + DMX200 vs. MUT high LOS         | -0.09756 | -0.2984 to 0.1033    | 0.6113  |
| WT low LOS + DMX200 vs. MUT low LOS + DMX200 | -0.3356  | -0.5746 to -0.09652  | 0.0076  |
| MUT VEH vs. MUT high LOS                     | 0.168    | -0.02310 to 0.3590   | 0.0951  |
| MUT VEH vs. MUT low LOS + DMX200             | -0.07005 | -0.3085 to 0.1684    | 0.8445  |
| MUT high LOS vs. MUT low LOS + DMX200        | -0.238   | -0.4981 to 0.02213   | 0.08    |
| <b>12 weeks</b>                              |          |                      |         |
| WT VEH vs. WT high LOS                       | 0.1152   | -0.02442 to 0.2548   | 0.1396  |
| WT VEH vs. WT low LOS + DMX200               | 0.03887  | -0.1286 to 0.2064    | 0.9732  |
| WT VEH vs. MUT VEH                           | -0.2644  | -0.4143 to -0.1145   | 0.0005  |
| WT VEH vs. MUT high LOS                      | -0.0348  | -0.2025 to 0.1329    | 0.9842  |
| WT VEH vs. MUT low LOS + DMX200              | -0.1839  | -0.3718 to 0.003888  | 0.0563  |
| WT high LOS vs. WT low LOS + DMX200          | -0.07633 | -0.2271 to 0.07440   | 0.5762  |
| WT high LOS vs. MUT VEH                      | -0.3796  | -0.5083 to -0.2509   | <0.0001 |
| WT high LOS vs. MUT high LOS                 | -0.15    | -0.3006 to 0.0005780 | 0.0512  |
| WT high LOS vs. MUT low LOS + DMX200         | -0.2991  | -0.4757 to -0.1226   | 0.0016  |
| WT low LOS + DMX200 vs. MUT VEH              | -0.3032  | -0.4628 to -0.1437   | 0.0003  |
| WT low LOS + DMX200 vs. MUT high LOS         | -0.07367 | -0.2491 to 0.1017    | 0.7578  |
| WT low LOS + DMX200 vs. MUT low LOS + DMX200 | -0.2228  | -0.4166 to -0.02899  | 0.0209  |
| MUT VEH vs. MUT high LOS                     | 0.2296   | 0.07012 to 0.3890    | 0.0033  |
| MUT VEH vs. MUT low LOS + DMX200             | 0.08043  | -0.1020 to 0.2629    | 0.6627  |
| MUT high LOS vs. MUT low LOS + DMX200        | -0.1491  | -0.3430 to 0.04476   | 0.1809  |

Table S4. Descriptive statistics (mean and standard deviation) for the different groups at the three timepoints (4,8, 12 weeks).

| Group                 | Statistics | 4 weeks | 8 weeks | 12 weeks |
|-----------------------|------------|---------|---------|----------|
| WT TRV027             | Mean       | 1.29    | 1.62    | 1.70     |
|                       | SD         | 0.08    | 0.10    | 0.09     |
| MUT TRV027            | Mean       | 1.51    | 1.89    | 2.03     |
|                       | SD         | 0.09    | 0.07    | 0.12     |
| WT VEH                | Mean       | 1.33    | 1.62    | 1.69     |
|                       | SD         | 0.12    | 0.14    | 0.11     |
| MUT VEH               | Mean       | 1.50    | 1.82    | 1.96     |
|                       | SD         | 0.10    | 0.05    | 0.08     |
| WT medium LOS         | Mean       | 1.22    | 1.44    | 1.53     |
|                       | SD         | 0.07    | 0.04    | 0.07     |
| MUT medium LOS        | Mean       | 1.45    | 1.70    | 1.85     |
|                       | SD         | 0.13    | 0.15    | 0.16     |
| WT BARB + medium LOS  | Mean       | 1.26    | 1.41    | 1.51     |
|                       | SD         | 0.07    | 0.08    | 0.11     |
| MUT BARB + medium LOS | Mean       | 1.45    | 1.74    | 1.83     |
|                       | SD         | 0.06    | 0.07    | 0.06     |
| WT high LOS           | Mean       | 1.35    | 1.52    | 1.58     |
|                       | SD         | 0.09    | 0.08    | 0.08     |
| MUT high LOS          | Mean       | 1.49    | 1.66    | 1.73     |
|                       | SD         | 0.13    | 0.15    | 0.12     |
| WT low LOS + DMX200   | Mean       | 1.33    | 1.56    | 1.65     |
|                       | SD         | 0.09    | 0.10    | 0.12     |
| MUT low LOS + DMX200  | Mean       | 1.58    | 1.89    | 1.88     |
|                       | SD         | 0.15    | 0.14    | 0.12     |
